# Supplementary material for: Study on adsorption of phosphate from aqueous solution by zirconium modified coal gasification coarse slag
Source: Royal Society of Chemistry journal article supplement (doi:10.1039/d2ra02263j), 2022-01-01
Supplement: d2ra02263j1.pdf [file d2ra02263j1.pdf]

## Supplementary Material

### **Study on adsorption of phosphate from aqueous solution by zirconium modified coal gasification coarse slag**

Baoguo Yang <sup>a,b</sup>, Fenglan Han <sup>\*c</sup>, Zuoming Xie <sup>a</sup>, Zhe Yang <sup>a</sup>, Fengcheng Jiang <sup>d</sup>, Sen Yang <sup>a</sup>, Yilian Li <sup>\*a</sup>

<sup>a</sup> Hubei Key Laboratory of Yangtze River Basin Environmental Aquatic Science, School of Environmental Studies, China University of Geosciences, NO. 68 Jincheng Street, East Lake High-Tech Development Zone, Wuhan, 430078, P. R. China

<sup>b</sup> Ningxia Geophysical and Geochemical Survey Institute, Yinchuan 750001, China

<sup>c</sup> School of Materials Science and Engineering, North Minzu University, Yinchuan 750021, China

<sup>d</sup> Institute of Resource and Environment, Henan Polytechnic University, Jiaozuo, Henan 454003, China

\*Corresponding author

E-mail address: 625477897@qq.com (F. Han), yl.li@cug.edu.cn\_(Y. Li)

---

### **Text S-1: The removal efficiency (%R) and sorption capacity $Q_t$**

The removal efficiency (%R) and sorption capacity  $Q_t$  (mg/g) were computed according to the following equations: <sup>1</sup>

$$\%R = (C_o - C_t) \times 100 / C_o \quad (1)$$

$$Q_t = (C_o - C_t) \times V / m \quad (2)$$

where  $C_o$ ,  $C_t$  are respective phosphate concentrations (mg/L) of the initial and different time,  $m$ ,  $V$  are the mass of sorbent (g) and the solution volume (ml), respectively.

### **Text S-2: Langmuir and Freundlich isotherm equations**

The Langmuir and Freundlich equations can be expressed as follows: <sup>2</sup>

Langmuir isotherm equation:

$$q_e = K_L q_m C_e / (1 + K_L C_e) \quad (3)$$

Freundlich isotherm equation:

$$q_e = K_F C_e^{1/n} \quad (4)$$

Where  $C_e$  (mg/L) represents the phosphate concentration at the equilibrium stage of sorption,  $q_e$  and  $q_m$  represents the sorption amounts of phosphate by CGCS-Zr4 at equilibrium and the theoretical maximum monolayer sorption capacity, respectively,  $K_L$  refers to the Langmuir constant, and measures the sorbent affinity to the solute.  $K_F$  is the adsorption coefficient.  $n$  refers characteristic surface heterogeneity.

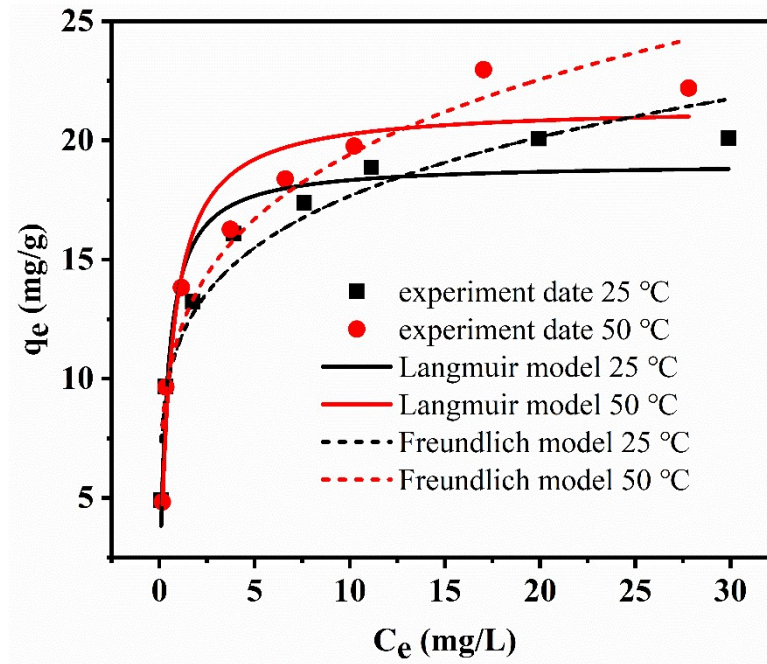

**Fig. S-1.** Adsorption isotherms of phosphate by CGCS-Zr4 at 25 and 50 °C. Adsorption conditions: reaction time, 24 h; adsorbent dose, 1 g/L; and shake speed, 160 rpm.

**Table S-1**

Adsorption isotherm parameters. Experimental conditions: pH value = 6, adsorbent dosage = 1 g/L, reaction time = 24 h.

| T (°C) | Langmuir     |              |       | Freundlich |              |       |
|--------|--------------|--------------|-------|------------|--------------|-------|
|        | $q_m$ (mg/g) | $k_L$ (L/mg) | $R^2$ | 1/n        | $K_F$ (mg/g) | $R^2$ |
| 25     | 19.814       | 2.582        | 0.934 | 0.189      | 11.437       | 0.942 |
| 50     | 22.372       | 1.716        | 0.941 | 0.217      | 11.781       | 0.931 |

**Table S-2**

Comparison of the adsorption capacity of CGCS-Zr4 and adsorbents given in literatures for phosphate.

| Adsorbent | Initial concentration<br>(mg P/L) | pH | Temperatur<br>e<br>(°C) | Sorption capacity<br>(mg/g) | Ref. |
|-----------|-----------------------------------|----|-------------------------|-----------------------------|------|
|-----------|-----------------------------------|----|-------------------------|-----------------------------|------|

|                             |           |         |       |       |            |
|-----------------------------|-----------|---------|-------|-------|------------|
| Zr/Al-Mt                    | 20–50     | 5.0     | 25    | 17.2  | 3          |
| BFSs                        | 50-500    | 7.0     | 20    | 18.9  | 4          |
| La-Ves                      | 1.02-5.03 | 7.1     | 25    | 6.7   | 5          |
| Magnetic Fe–Zr binary oxide | 0-100     | 4.0     | 25    | 13.65 | 6          |
| Iron oxide tailings         | 5-150     | 6.6-6.8 | 20-21 | 8.2   | 7          |
| Zr-CNTs                     | 5-50      | 3       | 30    | 10.9  | 8          |
| Lepidocrocite               | 2–100     | 7.2     | 25    | 3.2   | 9          |
| CGCS-Zr4                    | 5-50      | 6       | 30    | 19.81 | This study |

### Text S-3: kinetic model

The equations of the four kinetic models can be displayed below: <sup>10, 11</sup>

The pseudo first order equation:

$$q_t = q_e (1 - e^{-k_1 t}) \quad (5)$$

The pseudo second order equation:

$$q_t = k_2 q_e^2 t / (1 + k_2 q_e t) \quad (6)$$

The intraparticle diffusion model:

$$q_t = K_{id} t^{1/2} + C \quad (7)$$

Elovich equation:

$$q_t = \frac{1}{\beta} \ln (1 + \alpha \beta t) \quad (8)$$

where  $q_e$  and  $q_t$  represent the respective adsorbed amount of phosphate at equilibrium and any time  $t$  (min).  $k_1$ ,  $k_2$  and  $k_{id}$  are the rate constants of the Eq. (5), Eq. (6) and Eq. (7), respectively.  $C$  represents the thickness of the boundary layer.  $\alpha$  is the initial adsorption rate;  $\beta$  is the desorption constant.

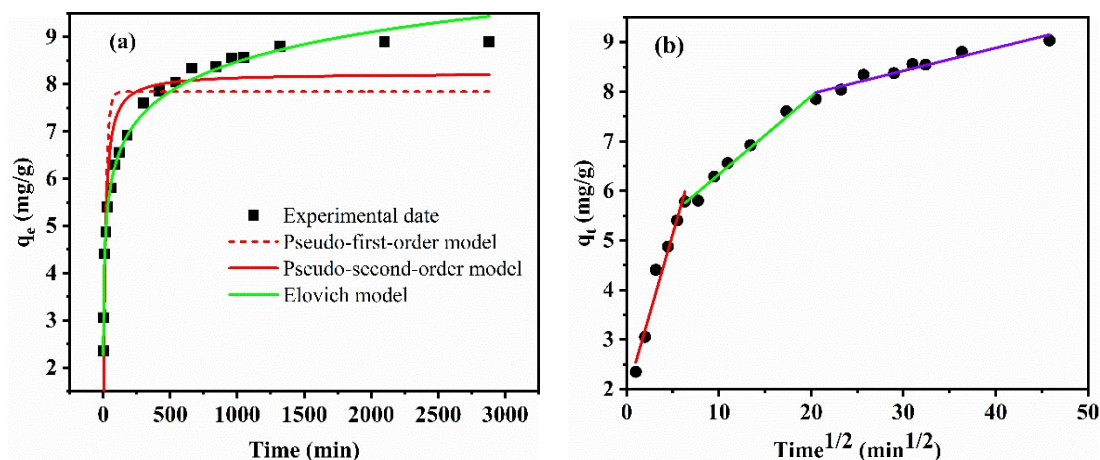

Fig. S-2. Adsorption kinetics of phosphate on CGCS-Zr4: (a) pseudo-first-order, pseudo-second-order and elovich models; (b) intraparticle diffusion model. Adsorption conditions: temperature, 25 °C; shake speed: 160 rpm, adsorbent dose: 1 g/L, and initial phosphate concentration: 10 mg/L.

Table S-3

Adsorption kinetic parameters of CGCS-Zr4 to phosphate.

| Kinetic models and Experimental results | Plot parameters                      | Values |
|-----------------------------------------|--------------------------------------|--------|
| Experimental adsorption capacity        | $q_{e,exp}$ (mg/g)                   | 9.14   |
| Pseudo-first-order                      | $q_{e,cal}$ (mg/g)                   | 7.84   |
|                                         | $k_1$ (min <sup>-1</sup> )           | 0.055  |
|                                         | R <sup>2</sup>                       | 0.718  |
| Pseudo-second-order                     | $q_{e,cal}$ (mg/g)                   | 8.233  |
|                                         | $K_2$ (g/(mg min))                   | 0.010  |
|                                         | R <sup>2</sup>                       | 0.861  |
| Elovich                                 | $\alpha$ (mg/ (g min))               | 10.181 |
|                                         | $\beta$ (g/mg)                       | 1.100  |
|                                         | R <sup>2</sup>                       | 0.990  |
| Intraparticle diffusion                 | $K_{id1}$ (mg/g min <sup>1/2</sup> ) | 0.646  |
|                                         | C                                    | 1.899  |
|                                         | R <sup>2</sup>                       | 0.965  |
|                                         | $K_{id2}$ (mg/g min <sup>1/2</sup> ) | 0.158  |

|                                             |       |
|---------------------------------------------|-------|
| C                                           | 4.758 |
| R <sup>2</sup>                              | 0.982 |
| <hr/>                                       |       |
| K <sub>id3</sub> (mg/g min <sup>1/2</sup> ) | 0.046 |
| <hr/>                                       |       |
| C                                           | 7.039 |
| R <sup>2</sup>                              | 0.936 |
| <hr/>                                       |       |

**Table S-4**

Main chemical constituents of ditch water before and after adsorption.

| Ion                       | TOC   | Ca <sup>2+</sup> | K <sup>+</sup> | Mg <sup>2+</sup> | Na <sup>+</sup> | PO <sub>4</sub> <sup>3-</sup> | F <sup>-</sup> | Cl <sup>-</sup> | NO <sub>3</sub> <sup>-</sup> | SO <sub>4</sub> <sup>2-</sup> | pH   |
|---------------------------|-------|------------------|----------------|------------------|-----------------|-------------------------------|----------------|-----------------|------------------------------|-------------------------------|------|
| Unit                      | mg/L  | mg/L             | mg/L           | mg/L             | mg/L            | mg/L                          | mg/L           | mg/L            | mg/L                         | mg/L                          |      |
| Content before adsorption | 14.03 | 66.6             | 7.75           | 120              | 533             | 0.063                         | 1.06           | 508             | 3.24                         | 709                           | 7.98 |
| Content after adsorption  | 11.41 | 58.4             | 7.50           | 111              | 495             | 0.000                         | 0.036          | 512             | 3.16                         | 715                           | 8.19 |

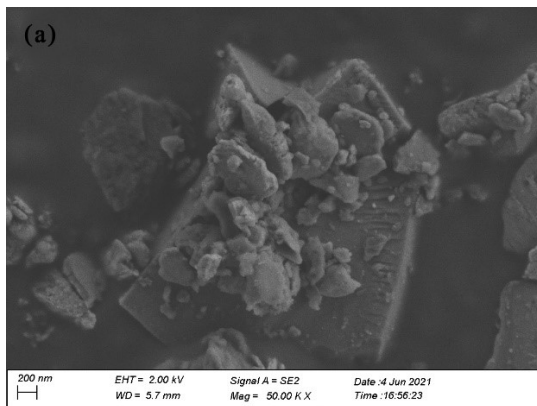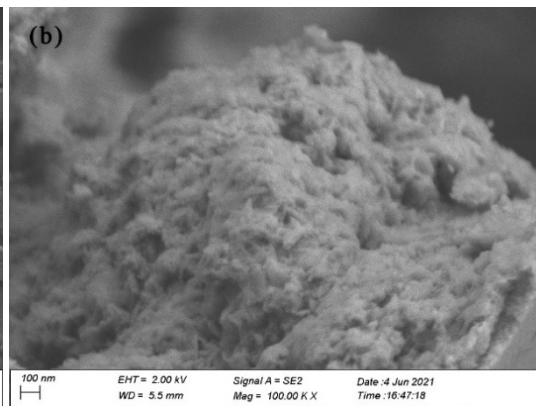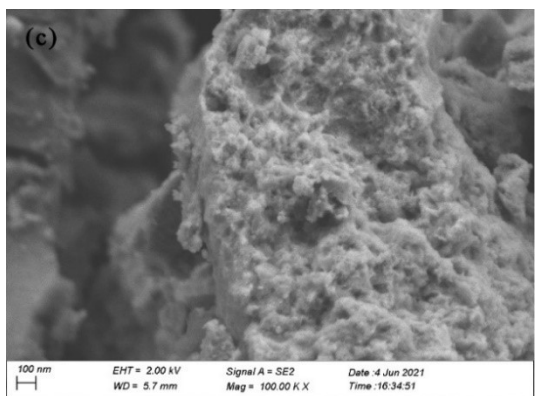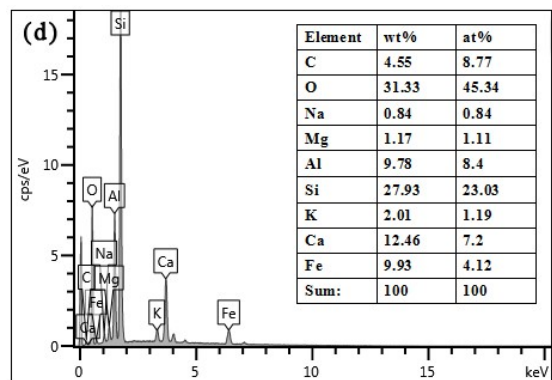

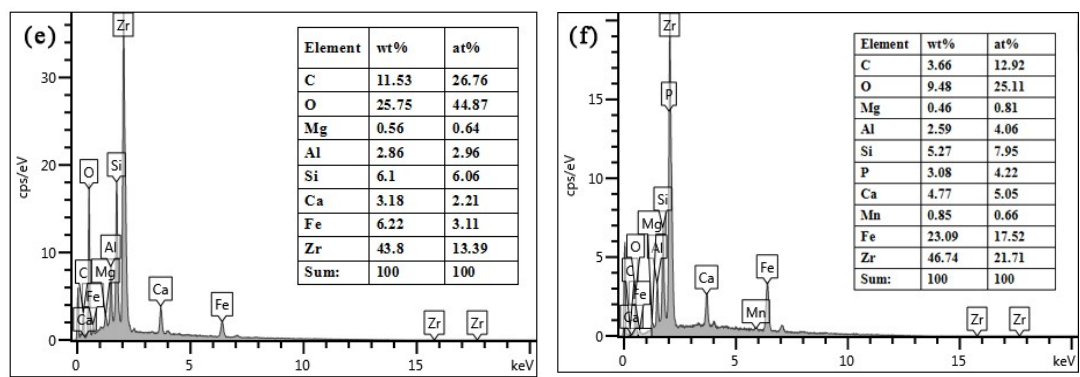

**Fig. S-3.** SEM images of (a) CGCS, (b) CGCS-Zr, (c) CGCS-Zr after phosphate adsorption, (d) EDS spectrum of CGCS, (e) CGCS-Zr, and (f) P-loaded CGCS-Zr .

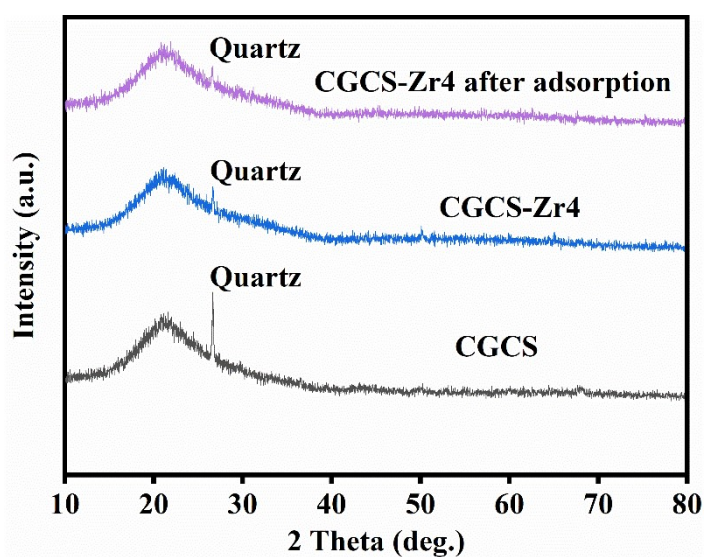

**Fig. S-4.** XRD spectrum of samples.

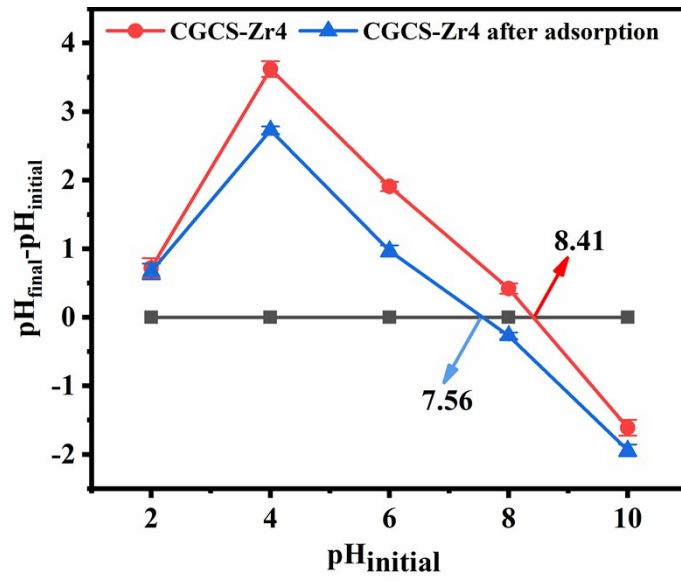

Fig. S-5. the changes of  $pH_{pzc}$  of CGCS-Zr4 and CGCS-Zr4 after phosphate adsorption.

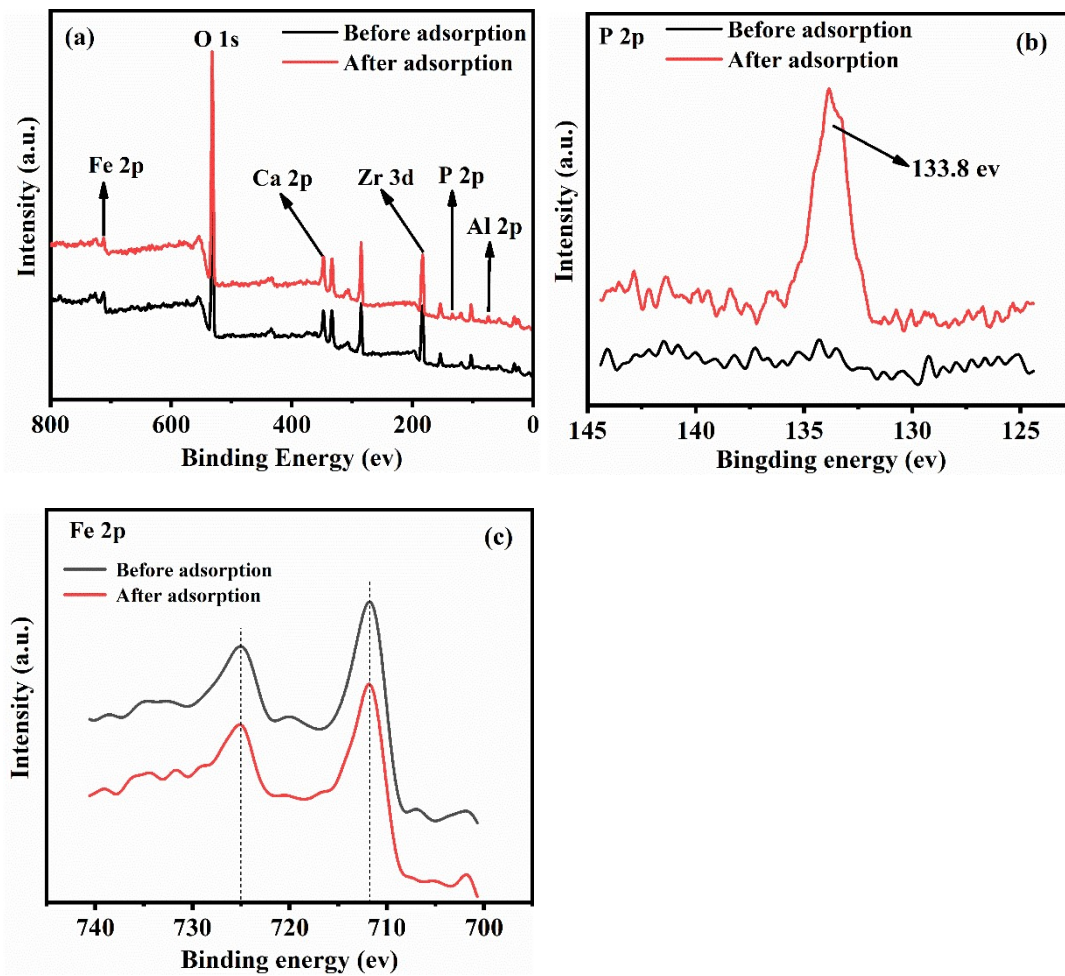



---

**Fig. S-6.** XPS analysis of CGCS-Zr4 before and after phosphate adsorption: (a) wide-scan spectra; (b) P 2p; (c) Fe 2 p.

## References

- 1 Y. Abdellaoui, H. Abou Oualid, A. Hsini, B. El Ibrahim, M. Laabd, M. El Ouardi, G. Giacomanni, Vallejos and P. Gamero-Melo, *Chemical engineering journal (Lausanne, Switzerland: 1996)*, 2021, **404**, 126600.
- 2 M.A. Usman and A.Y. Khan, *J. Hazard. Mater.*, 2022, **428**, 128238.
- 3 W. Huang, J. Chen, F. He, J. Tang, D. Li, Y. Zhu and Y. Zhang, *Appl. Clay Sci.*, 2015, **104**, 252-260.
- 4 B. Kostura, H. Kulveitová and J. Leško, *Water Res.*, 2005, **39**, 1795-1802.
- 5 H. Li, J. Ru, W. Yin, X. Liu, J. Wang and W. Zhang, *J. Hazard. Mater.*, 2009, **168**, 326-330.
- 6 F. Long, J. Gong, G. Zeng, L. Chen, X. Wang, J. Deng, Q. Niu, H. Zhang and X. Zhang, *Chem. Eng. J.*, 2011, **171**, 448-455.
- 7 L. Zeng, X. Li and J. Liu, *Water Res.*, 2004, **38**, 1318-1326.
- 8 Y. Gu, M. Yang, W. Wang and R. Han, *Journal of Chemical & Engineering Data*, 2019, **64**, 2849-2858.
- 9 N. Sleiman, V. Deluchat, M. Wazne, A. Courtin, Z. Saad, V. Kazpard and M. Baudu, *RSC Adv.*, 2016, **6**, 1627-1636.
- 10 M. Akram, H.N. Bhatti, M. Iqbal, S. Noreen and S. Sadaf, *Journal of Environmental Chemical Engineering*, 2017, **5**, 400-411.
- 11 A.A. Alqadami, M. Naushad, Z.A. ALOthman, M. Alsuhybani and M. Algamdi, *J. Hazard. Mater.*,

---

2020, **389**, 121896.
